# Supplementary material for: A mouse model featuring tissue-specific deletion of p53 and Brca1 gives rise to mammary tumors with genomic and transcriptomic similarities to human basal-like breast cancer
Source: PubMed Central journal article supplement (PMC6418066; doi:10.1007/s10549-018-5061-y), 2018-11-27

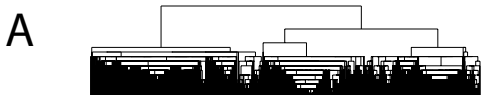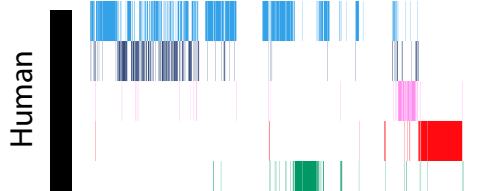

Luminal A  
Luminal B  
Her 2 enriched  
Basal-like  
Normal-like

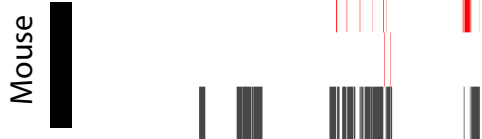

K14-Cre; p53 f/f Brca1 f/f  
KPBC Cell Line  
Other Mouse Models

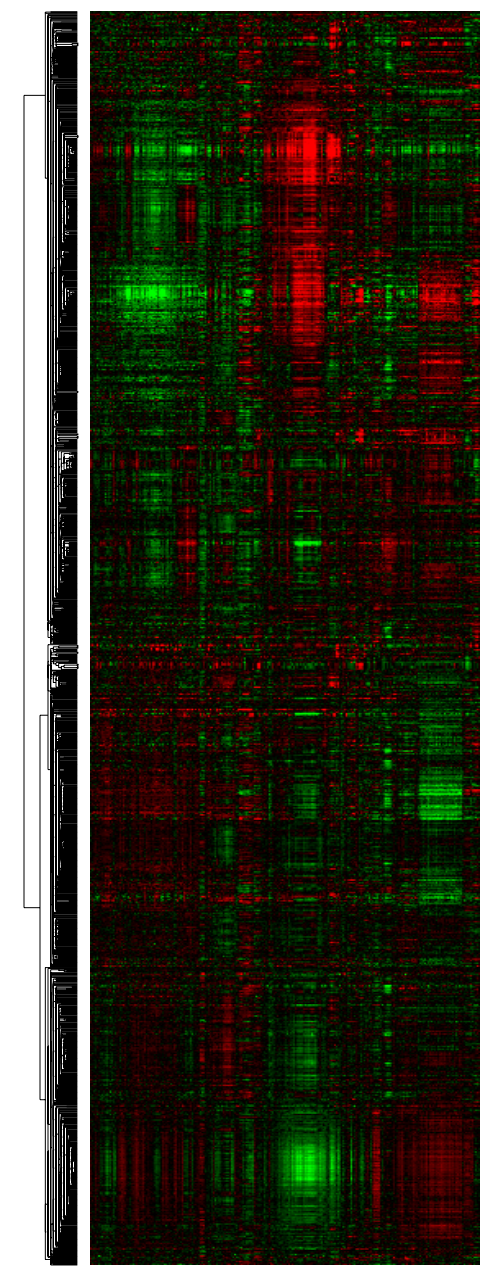

i  
ii  
iii  
iv

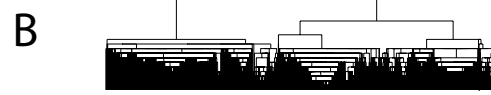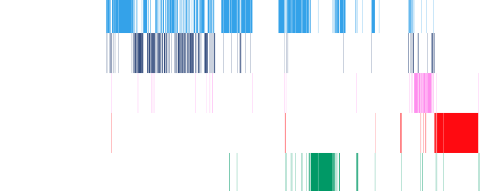

Luminal A  
Luminal B  
Her 2 enriched  
Basal-like  
Normal-like

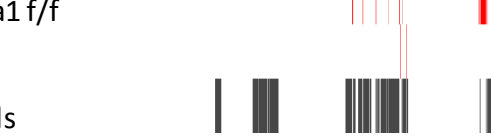

K14-Cre; p53 f/f Brca1 f/f  
KPBC Cell Line  
Other Mouse Models

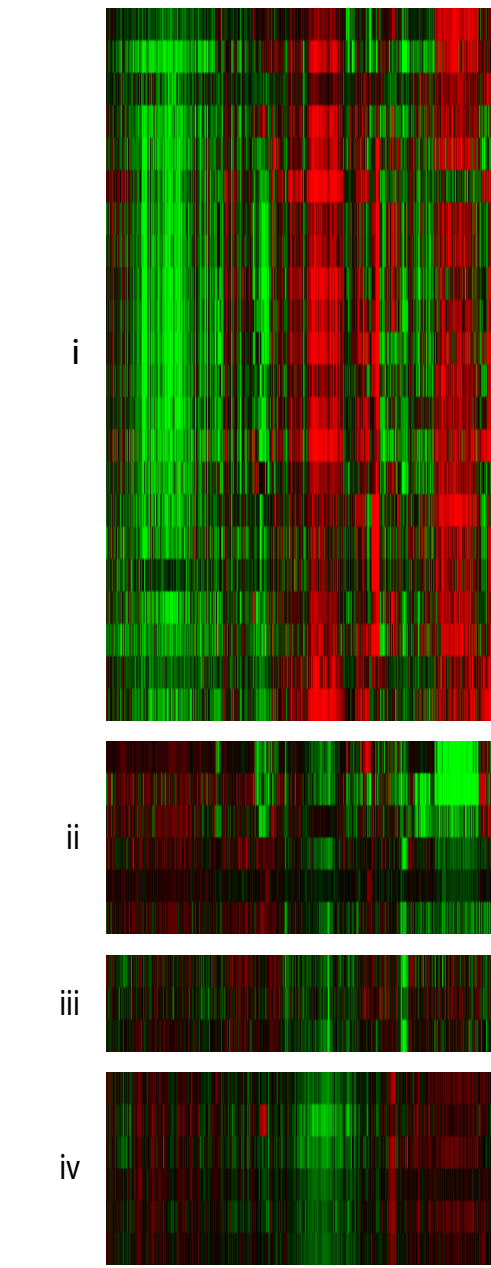

i  
ii  
iii  
iv

FOXC1  
SOX10  
CDH3  
BBOX1  
KLK6  
COL17A1  
ANXA8  
ANXA8L1  
KRT14  
KRT17  
KRT5  
KRT6B  
TRIM29  
SOSTDC1  
SERPINB5  
KRT16  
KRT6A  
KRT6C  
PKP1  
LY6D  
EDAR  
ID4  
  
FOXA1  
AGR3  
RERG  
STARD10  
RNF103  
TMC4  
  
CLDN3  
CLDN4  
CLDN7  
  
MCM2  
SPAG5  
ORC6  
TIMELESS  
MCM6  
PCNA

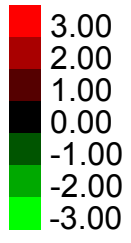

Supplement: 10549_2018_5061_MOESM1_ESM.pdf [file 10549_2018_5061_MOESM1_ESM.pdf]
