# Supplementary material for: A mouse model featuring tissue-specific deletion of p53 and Brca1 gives rise to mammary tumors with genomic and transcriptomic similarities to human basal-like breast cancer
Source: PubMed Central journal article supplement (PMC6418066; doi:10.1007/s10549-018-5061-y), 2018-11-27
Supplement: 10549_2018_5061_MOESM2_ESM.pdf [file 10549_2018_5061_MOESM2_ESM.pdf]

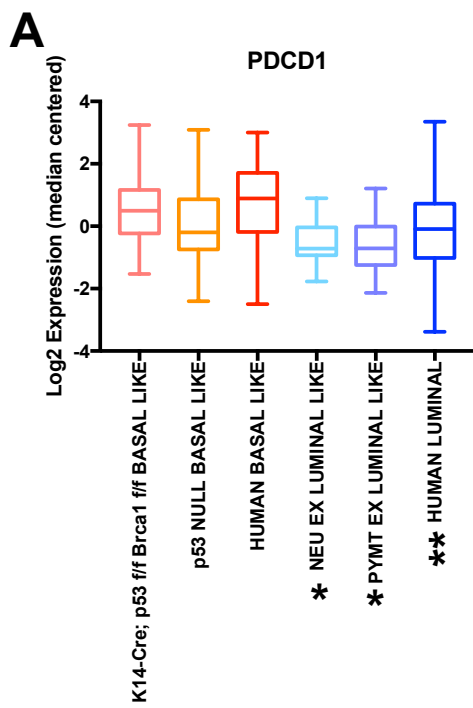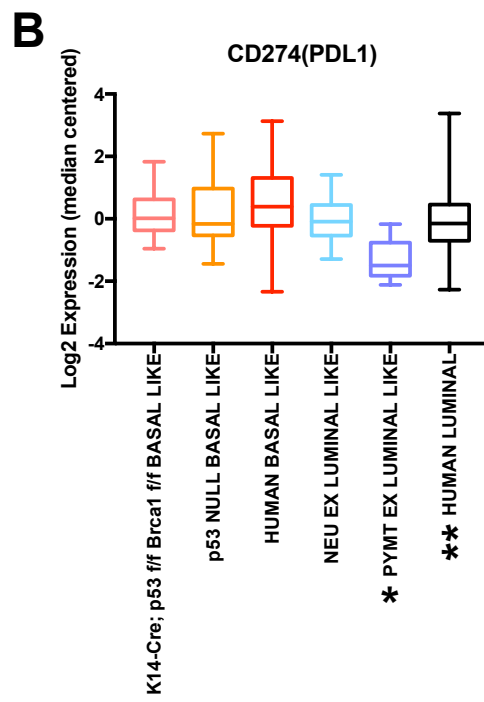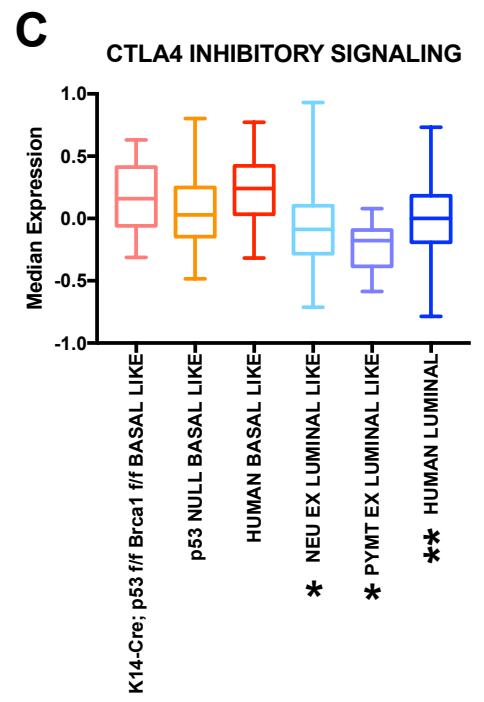

\* =  $p < 0.05$  in murine comparison to K14-Cre; p53 f/f Brca1 f/f .

\*\* =  $p < 0.05$  in comparison of human basal-like vs luminal tumors.
