# Supplementary material for: A mouse model featuring tissue-specific deletion of p53 and Brca1 gives rise to mammary tumors with genomic and transcriptomic similarities to human basal-like breast cancer
Source: PubMed Central journal article supplement (PMC6418066; doi:10.1007/s10549-018-5061-y), 2018-11-27
Supplement: 10549_2018_5061_MOESM3_ESM.pdf [file 10549_2018_5061_MOESM3_ESM.pdf]

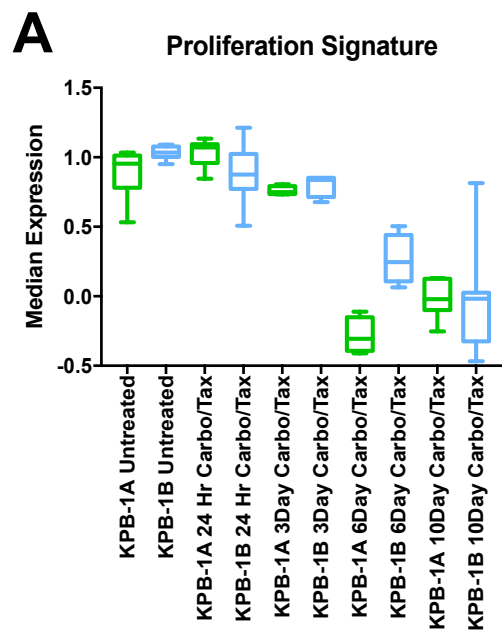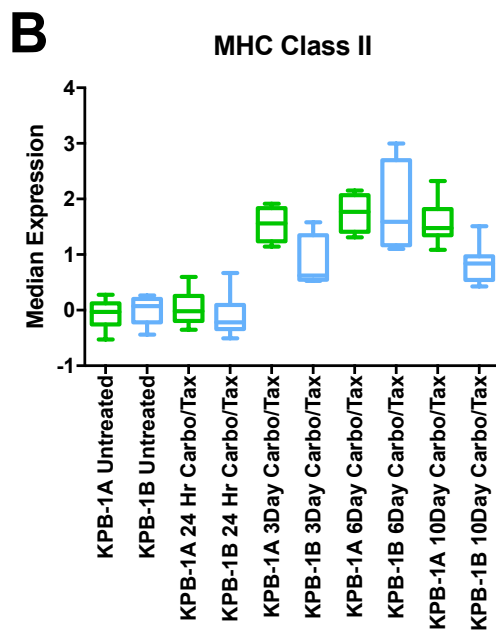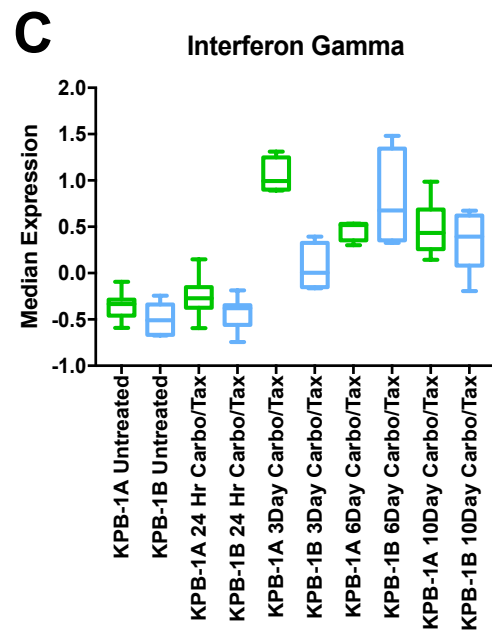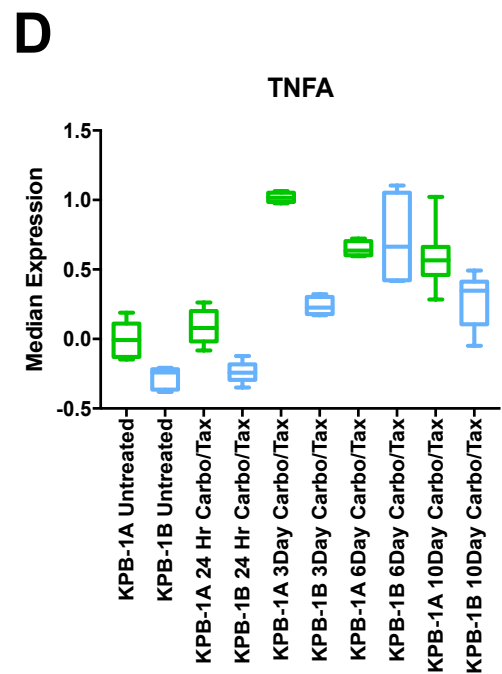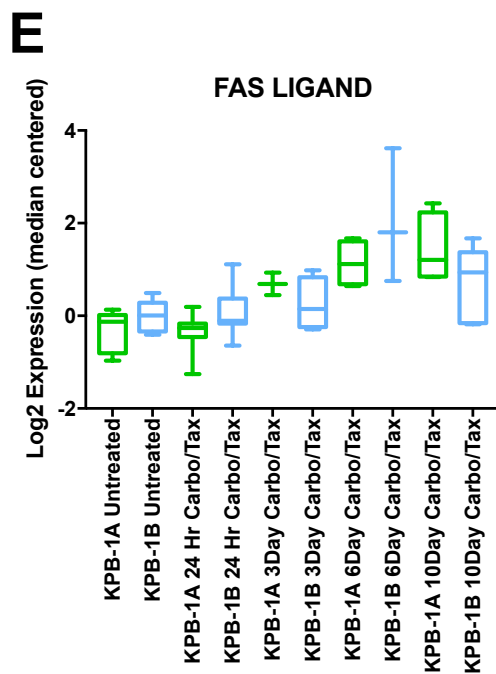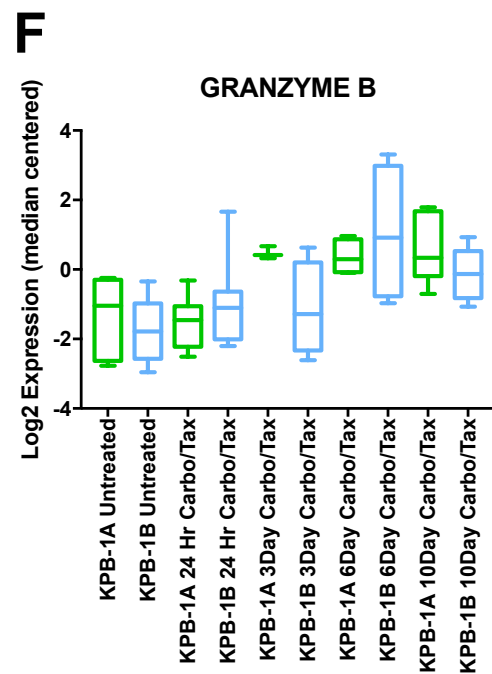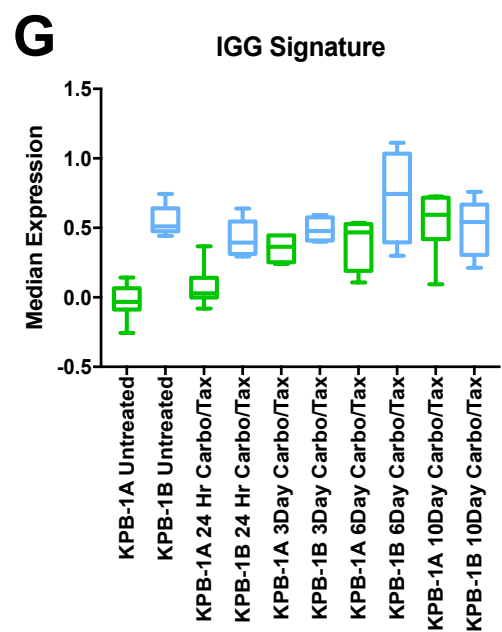

\* ANOVA FOR KPB-1B & KPB-1A PERFORMED SEPARATELY; ALL  $p < 0.05$ .  
EXCEPTION: IGG Signature  $p = 0.1$  in KPB-1B line.
